# Supplementary material for: Single and interactive effects of variables associated with climate change on wheat metabolome
Source: Front Plant Sci. 2022 Oct 10;13:1002561. doi: 10.3389/fpls.2022.1002561 (PMC9589161; doi:10.3389/fpls.2022.1002561)
Supplement: Supplementary file 1 [file Table_1.xlsx]

## Sheet: Table S1
Supplementary Table 1A. The metabolites content in the leaves of wheat plant exposed to various climate variable treatments. The data represents the peak intensity of the metabolites identified in the GC-MS data. Ctr, control treatment; eC, elevated CO2; eT, elevated temperature; D, drought; eC+eT, elevated CO2 and elevated temperature; eC+ D, elevated CO2, and drought; eT+D, elevated temperature…
Regimes	Abbr.	Replicate	Adenine	Uracil	Guanosine	Cytidine	Adenosine monophosphate	Uridine Monophosphate	Thymidine Monophosphate	3-hydroxybenzoic acid	Protocatechuic acid	3-coumaric acid	Vanillic acid	Gallic acid	Caffeic acid	Ferulic acid	Syringic acid	Sinapic acid	Chlorogenic acid	Luteolin	Kaempferol	Quercetin	(-)-epigallocatechin	Isovitexin	Homoorientin	(-)-epigallocatechin gallate	Saponarin	Pentose	Hexose	Disaccharide	?-Ketoglutaric acid	Pyruvic acid	Shikimic acid	Citric acid	L-(-)-Malic acid	Succinic acid	Oxalacetic acid	Lactic acid	Glycine	Alanine	Valine	Leucine	Serine	Threonine	Methionine	Lysine	Aspartic acid	Asparagine	Glutamic Acid
			A	U	G	C	AMP	UMP	TMP	3hyd	Cate	Coum	Vani	Gall	Caff	Feru	Syri	Sina	Chlor	Lute	Kaem	Quer	Epig	Isov	Homo	epgg	Sapo	Pentose	Hexose	Disacharides	Ket	Pyru	Shi	Cit	Mal	Suc	Oxa	Lac	Gly	Ala	Val	Leu	Ser	Thr	Met	Lys	Asp	Asn	Glu
Control	Ctr	R1	14801	3790	0	68103	99105	5563	56643	20749	40107	13582	16886	47153	20735	0	20300	18289	605840146	13009	10317	2908	11003	19782813	306848564	23889	23921	319908	64992918	16845902	927282	88825	300935	8535545	166801667	44547655	162289	681273	156855	35861634	289875872	39130816	2838742	493161	166002	378938	1630555	7992	72400712
	Ctr	R2	13055	3898	0	38567	107265	10119	50007	12361	52477	12157	18777	35618	25505	0	19891	13085	768100004	15983	18198	14903	10487	16385981	319930371	18466	12809	237380	8166501	17984678	678363	99321	373453	9849032	173078794	47977898	136313	656010	134614	34829784	374957858	31135904	2754477	557260	178330	478374	1893128	6836	91035373
	Ctr	R3	98914	4655	0	55196	108863	4333	69913	17555	56252	9398	10172	33808	19300	0	22375	13650	621250611	35892	4809	6632	10774	18623671	399833804	36542	46710	211303	10733623	18918052	880074	71072	320605	10312716	135335708	44512707	197138	579726	154659	34609477	391326501	41048057	2745301	588466	156987	572172	2330466	5742	96290208
Drought	D	R1	64262	4058	14000	66226	65185	3634	82776	28201	19898	11711	29393	22447	22669	65746	24454	18874	741077929	22724	4347	7326	14168	18955476	259366772	3706	27677	186971	10335300	19156176	542638	31024	421054	9426389	138315485	45462140	136774	333592	58230	38066985	527579970	40704831	2564470	959021	151114	346559	1559039	7666	85047842
	D	R2	21313	2145	13988	12035	73017	8361	60527	13962	16465	10902	19435	28697	28650	46745	22776	12854	466323195	15201	3948	6920	21243	18529049	278754055	8584	21692	213811	13673905	16088228	653408	77148	254927	10999720	174983697	42766796	122251	415893	64969	30961994	416177240	23898991	2160913	848571	190234	363851	1352515	6160	94115714
	D	R3	500725	3444	13379	15072	57374	9911	70556	14536	13292	17355	23212	33070	22072	49426	30694	25622	848249296	29310	5983	8268	15152	12513809	275235611	10415	26823	236473	11495315	14573872	437449	37835	278061	8657558	125365160	44726704	137906	422389	46592	27519469	628696067	25788102	2652685	853853	149305	434300	1628433	7571	89660939
Elevated CO2	eC	R1	181383	7331	0	67483	95696	4195	2146	14995	23230	15142	18075	18175	26374	0	31429	24688	1050507125	54593	2941	10530	4393	16115282	335332489	11898	22480	136425	38605119	15470777	724182	245615	684399	4674856	115597955	39264525	38804	86544	71106	30554030	592574357	68325701	1480109	202685	532481	1001408	1083781	9656	49726184
	eC	R2	214429	8001	0	58525	93264	8149	3362	12081	23975	3284	10324	16434	11108	0	33422	12969	1048442257	15822	4216	13918	7200	15474475	300653963	7410	25212	180587	32283513	15255590	451710	157200	406079	6887043	115060874	41574120	65164	139827	62511	28388462	518784939	72245083	1335171	355761	706889	1499290	906225	7471	57523813
	eC	R3	64420	7540	0	21663	67515	9959	27569	19690	35271	32346	16731	22761	20214	0	20521	13866	512522025	35563	9065	18519	2703	22000947	281818166	4055	20918	202474	10240241	12741335	260170	198706	526118	4325141	155337241	45026350	78158	145698	69273	34390576	450315450	63080933	2320347	352763	462045	1561696	1105791	6021	60141225
Elevated Temp.	eT	R1	71439	0	2438	133503	107890	3047	391423	75625	46065	6505	22795	49020	17259	387378	39980	18668	728253128	12840	4445	4736	2896	12797553	267721113	27506	5680	101092	13566055	15318321	1377620	378922	369454	4972053	58316766	23020286	126929	101507	128963	28201332	512010799	50544544	4679589	564838	135404	760131	1984345	6908	78943969
	eT	R2	80949	0	4345	73492	77796	5129	258753	52820	32870	5840	27978	34964	14277	219416	18673	12396	866852934	14596	1920	7263	3956	8586626	246721024	32689	22238	208348	7530556	18204004	1592637	415496	394852	8524349	69767025	18813073	146832	207271	110349	27706583	728052527	34290352	5139451	432828	124773	840466	1474418	5272	75841572
	eT	R3	68730	0	5554	74757	35416	2660	149601	54938	30130	5487	20945	33120	10909	230416	15233	20387	609047992	11764	11194	5753	3191	14778357	263247679	43696	32747	251818	10216264	15160060	1236123	419836	304307	6266786	68678302	30132989	151460	169097	118430	30210289	436761681	56271520	4778676	409542	196551	620116	1563856	7701	80194437
Elevated CO2 and drought	eC+D	R1	68205	3678	6700	35703	105719	3514	113023	24469	37534	17569	14031	4408	14913	0	26438	11616	679807508	25522	3694	5548	8123	20826277	314342111	3384	20492	164830	8216035	17742813	615423	87740	450993	7870910	149759452	43427418	35996	489460	17789	35407944	342242490	77532589	2053999	721620	336254	1432476	4417819	8598	94121214
	eC+D	R2	63801	4021	3846	36342	139733	6883	90021	25994	47336	13385	20585	8610	19132	0	55346	22281	752889605	101771	5580	2623	9527	16251311	316918980	14221	25309	289983	44915614	14727635	560993	41454	503344	5715424	120293724	35899614	44085	346070	32027	32912378	400582937	51753177	1526281	616529	273462	2675141	1921374	7130	60149465
	eC+D	R3	275533	3618	8875	51716	126643	3528	90856	26679	44737	12590	21172	6892	21977	0	33049	31664	1073772774	50490	10668	2321	4839	14202523	333150286	4163	21986	334356	51106068	13735264	646947	94916	664485	6175053	241191464	32267933	28349	392947	37353	24241661	586454662	56708773	1676461	790133	294640	1909974	2800588	6619	89808659
Elevated Temp. and Drought	eT+D	R1	211638	3987	12916	66510	136153	3726	40876	47180	36995	20116	7008	28820	17268	821204	34486	17375	517114249	14727	10723	2435	27348	13983205	270334675	34227	45892	274401	13915088	17124377	963088	323618	291126	7719676	65104010	36984520	64799	309060	65690	30698068	373437568	50425189	3550462	716618	355368	2787419	1590971	4713	89415718
	eT+D	R2	86508	3645	8000	54479	74843	3859	350975	64293	33786	17942	6854	28018	17073	293776	25353	26707	823465533	27843	12054	5579	23086	15630079	284673362	32877	39757	232869	27349755	13698711	1442723	400016	308246	6809949	75193061	28933764	68852	456991	84490	32698853	438976613	64364383	3408269	645714	402903	2416726	1920975	5675	89640935
	eT+D	R3	163875	3114	3206	83043	82779	3092	387448	55060	29736	18632	7971	30348	17101	417758	11723	29738	611120092	19997	9523	2349	23867	16656256	288576429	23888	25197	249059	11327049	17698271	1021331	532692	334122	5374345	45145431	22856310	44226	209653	57658	34716532	369518740	52739766	4236638	803313	260187	2016766	1725805	6943	106351203
Elevated CO2 and Elevated temp	eC+eT	R1	79483	9585	0	62808	32072	2855	35668	26636	89013	14263	11068	79196	44659	243524	17618	32956	625078877	34285	6046	2443	29720	10926091	221796907	30271	23833	194933	21897595	12565031	999970	342219	602219	12796443	85256066	32675679	111932	160577	58787	29993730	266148264	40146402	1326466	1130732	392675	667786	2020511	7161	48901937
	eC+eT	R2	54249	3175	0	85866	58085	3425	34223	39679	50513	15154	17449	79186	49364	288765	44189	6487	892814288	57034	13379	2413	16027	17875609	349682174	27140	31684	211424	21153906	16050886	1505855	203230	460561	9800135	62887839	33986097	107775	194531	69421	31418547	320138778	58582682	1738044	1146165	357923	671382	2389988	8895	61781595
	eC+eT	R3	29404	6380	0	96272	129245	1765	45323	23554	56737	13723	15724	88685	25987	352625	25453	20467	934215291	28360	7294	2446	10979	13947741	309796659	19734	33854	375805	21096804	18228800	1177658	341785	718094	10258000	74452056	30432916	97318	192090	58565	30820178	416705827	49050182	1011151	1537230	363517	576717	3241410	8056	65256497
Elevated CO2, elevated temp. and drought	eC+eT+D	R1	22939	3591	5532	59996	60680	7371	20009	40595	84666	26164	16406	23685	19984	955449	50645	19253	917984438	31481	6161	4566	7834	12438976	300674778	42537	56794	354327	28946224	13208069	943392	225209	401595	9642059	166110681	36590885	119076	444518	51416	37252753	534565685	100921157	1394008	791211	479592	2454662	1685411	7140	71622146
	eC+eT+D	R2	142074	3137	4162	66216	84726	5447	10922	61419	65496	23312	16116	45623	32965	813449	40520	18826	950198478	41640	5158	6543	7313	12445017	284399615	24787	73124	323819	46544993	12409654	844131	342405	389832	7374153	112924718	30362978	202938	390696	56510	26998032	462190091	95594785	1207299	528399	406201	1933684	2120292	9854	78841903
	eC+eT+D	R3	472157	3508	6763	78066	48620	3425	18107	37925	92269	20232	22983	35661	13313	1510686	59943	28500	302769865	47447	9999	3629	4246	18889032	279353076	37617	70304	144781	16519027	14416551	795876	352736	309693	6829087	99680510	39237992	106432	432011	42477	42238166	383956259	84759385	1151897	938272	337198	1979804	1697446	7540	69639468
Supplementary Table 1B. The metabolites content in the leaves of wheat plant exposed to various climate variable treatments. The data represents the concentration in ug/mg dry weight of the metabolites identified in the LC-MS data. Ctr, control treatment; eC, elevated CO2; eT, elevated temperature; D, drought; eC+eT, elevated CO2 and elevated temperature; eC+ D, elevated CO2, and drought; eT+D, e…
Regimes	Regimes	Replicate	Myo-inositol	Fructose	Galactose	Glucose	Sucrose	Galactinol	Raffinose	Lauric acid	Tetradecanoic acid	Pentadecanoic acid	9-(E)-hexadecenoic acid	Palmitic acid	Margaric	Linoleic	linolenic	Oleic acid	Stearic	11,14,17 eicosatrienoic acid	eicosanoic acid	Docosanoic acid	Tricosanoic acid	Tetracosanoic acid
			Myoi	Fruc	Glac	Gluc	Succ	Gala	Raff	Lau	4deco	5deco	6deco	Palm	Marg	Lino	linl	Olei	Stea	Eico	Esano	Doco	3cos	4cos
Control	Ctr	R1	0.23	2.19	0	2.39	43.41	0.18	0	0.031	0.075	0.023	0.438	4.54	0.033	1.944	10.892	0.012	0.423	0.018	0.031	0.107	0	0.055
	Ctr	R2	0.16	1.12	0	1.2	38.38	0.16	0	0.053	0.089	0.019	0.551	5.606	0.036	1.86	14.473	0.013	0.476	0.023	0.031	0.121	0	0.067
	Ctr	R3	0.26	2.89	0	3.11	44.6	0.21	0	0.031	0.072	0.017	0.506	4.74	0.037	2.047	11.379	0.013	0.573	0.02	0.038	0.108	0	0.062
Drought	D	R1	0.17	2.47	0	2.57	43.44	0.17	0	0.047	0.103	0.043	0.486	4.485	0.038	1.787	11.015	0.011	0.515	0.018	0.045	0.119	0	0.055
	D	R2	0.11	1.52	0	1.38	37.74	0.12	0	0.029	0.08	0.025	0.392	4.255	0.033	1.73	10.371	0.014	0.795	0	0.047	0.12	0	0.059
	D	R3	0.19	1.9	0	2.38	39.22	0.16	0	0.011	0.047	0.015	0.304	3.452	0.018	1.635	8.41	0.015	0.265	0.014	0.048	0.106	0	0.049
Elevated CO2	eC	R1	0.19	8.87	0.06	8.06	35.7	0.12	0	0.011	0.036	0.014	0.258	2.916	0.015	1.258	7.546	0.008	0.216	0.013	0.032	0.076	0	0.039
	eC	R2	0.16	6.58	0.06	5.44	31.63	0.14	0	0.013	0.029	0.009	0.145	2.293	0.009	1.183	5.243	0.008	0.216	0.008	0.031	0.068	0	0.028
	eC	R3	0.12	8.67	0	7.39	30.61	0.07	0	0.028	0.076	0.011	0.286	3.293	0.019	1.2	7.591	0.007	0.26	0.014	0.026	0.074	0	0.04
Elevated Temp.	eT	R1	0.27	2.28	0	2.14	42.62	0.11	0	0.014	0.058	0.019	0.28	3.18	0.018	1.498	7.336	0.008	0.298	0.016	0.035	0.094	0	0.048
	eT	R2	0.17	2.19	0	1.46	33.18	0.12	0	0.011	0.034	0.017	0.229	2.993	0.016	1.512	6.741	0.009	0.258	0.01	0.032	0.082	0	0.032
	eT	R3	0.21	3.44	0	2.59	39.47	0.12	0	0.006	0.049	0.016	0.4	3.907	0.024	1.504	8.977	0.009	0.284	0.016	0.049	0.125	0	0.052
Elevated CO2 and drought	eC+D	R1	0.18	7.71	0	6.81	33.59	0.16	0	0.01	0.041	0.01	0.237	2.841	0.016	1.363	6.714	0.007	0.223	0.014	0.026	0.075	0	0.038
	eC+D	R2	0.19	10.07	0.1	9.04	31.73	0.11	0	0.011	0.039	0.01	0.327	5.155	0.028	2.317	14.306	0.016	0.828	0.02	0.042	0.108	0	0.053
	eC+D	R3	0.14	8.24	0.06	7.4	23.79	0.11	0	0.007	0.04	0.015	0.361	3.899	0.021	1.797	9.143	0.013	0.353	0.019	0.071	0.153	0	0.066
Elevated Temp. and Drought	eT+D	R1	0.23	4.91	0	3.77	33.13	0.14	0	0.092	0.154	0.02	0.777	7.026	0.048	2.926	17.446	0.012	0.474	0.026	0.053	0.15	0.018	0.08
	eT+D	R2	0.19	6.64	0	5.39	29.17	0.13	0	0.046	0.129	0.025	0.69	5.822	0.046	2.368	12.771	0.013	0.38	0.022	0.055	0.149	0	0.073
	eT+D	R3	0.19	4.51	0	4.57	36.3	0.06	0	0.009	0.037	0.014	0.338	3.409	0.02	1.578	7.741	0.012	0.269	0.014	0.025	0.089	0	0.047
Elevated CO2 and Elevated temp	eC+eT	R1	0.13	5.39	0	4.56	28.47	0.06	0.85	0.036	0.118	0.032	0.331	5.473	0.039	1.475	10.709	0.009	0.293	0.025	0.049	0.141	0.034	0.061
	eC+eT	R2	0.15	4.49	0	3.98	35.21	0.1	1.08	0.013	0.043	0.014	0.262	3.251	0.016	1.487	6.683	0.007	0.198	0.012	0.039	0.095	0	0.038
	eC+eT	R3	0.19	4.7	0	4.42	41.65	0.16	1.48	0.032	0.052	0.017	0.31	3.532	0.018	1.55	7.541	0.008	0.307	0.012	0.034	0.091	0	0.038
Elevated CO2, elevated temp. and drought	eC+eT+D	R1	0.13	7.76	0	7.93	28.15	0.09	0.69	0.029	0.06	0.019	0.344	4.46	0.02	1.782	10.955	0.011	0.255	0.012	0.044	0.119	0	0.057
	eC+eT+D	R2	0.15	8.48	0	6.96	22.79	0.1	1.19	0	0.034	0.019	0.256	3.52	0.02	1.862	7.928	0.01	0.272	0.011	0.04	0.122	0	0.055
	eC+eT+D	R3	0.19	6.36	0	6.06	21.67	0.13	1.78	0.011	0.061	0.032	0.484	4.199	0.037	2.063	10.306	0.008	0.283	0.015	0.04	0.122	0	0.05
[truncated: 8 more columns]
